# Supplementary material
Source: PubMed Central journal article supplement (PMC11024773)

## Supplemental Online Content

Wienholtz NKF, Christensen CE, Do TP, et al. Efficacy and safety of erenumab for treatment of persistent erythema and flushing in rosacea. Published online March 8, 2024. *JAMA Dermatol*. doi:10.1001/jamadermatol.2024.0408

**eFigure 1.** Timeline for the Enrollment, Treatment, and Follow-Up Phase of the Trial  
**eFigure 2.** CONSORT Flow Diagram

This supplemental material has been provided by the authors to give readers additional information about their work.

**Figure 1.** Timeline for the Enrollment, Treatment, and Follow-Up Phase of the Trial

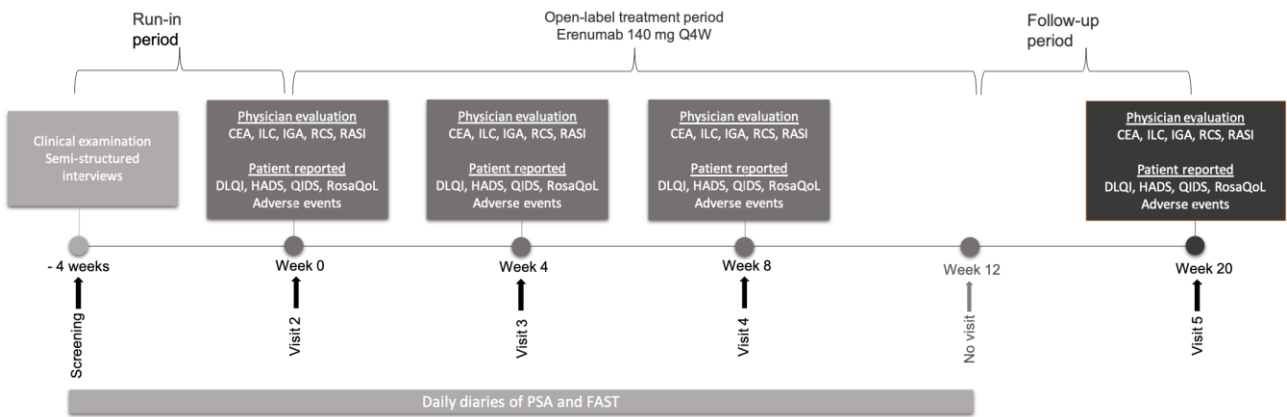

**eFigure 2. Consort Flow Diagram**

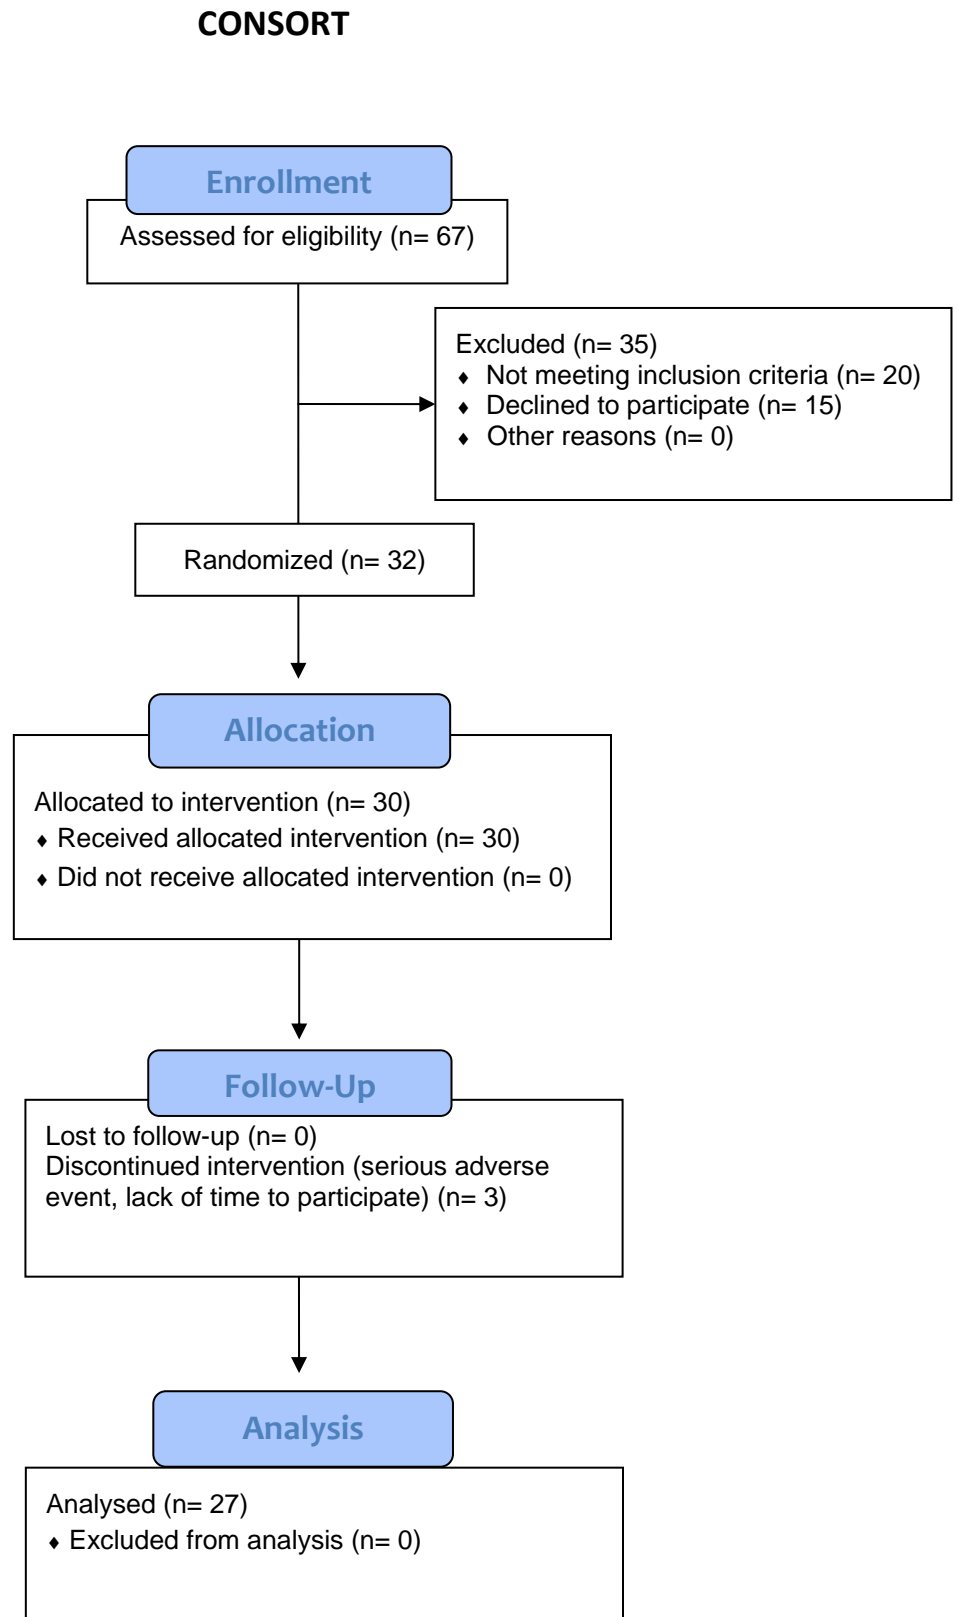

Supplement: jamadermatol-e240408-s002.pdf [file jamadermatol-e240408-s002.pdf]
