# Supplementary material
Source: PubMed Central journal article supplement (PMC11024773)
Supplement: jamadermatol-e240408-s004.pdf [file jamadermatol-e240408-s004.pdf]

## Data Sharing Statement

Wienholtz. Erenumab for Treatment of Persistent Erythema and Flushing in Rosacea. *JAMA Dermatol.* Published April 17, 2024. doi:10.1001/jamadermatol.2024.0408

### Data

**Data available:** No

### Additional Information

**Explanation for why data not available:** Data are available upon reasonable request from the corresponding author
